# Supplementary material
Source: MDPI journal article supplement (https://www.mdpi.com/2073-4433/11/5/518)

$$I_{Hcrit} = 18.35 \text{ A}$$

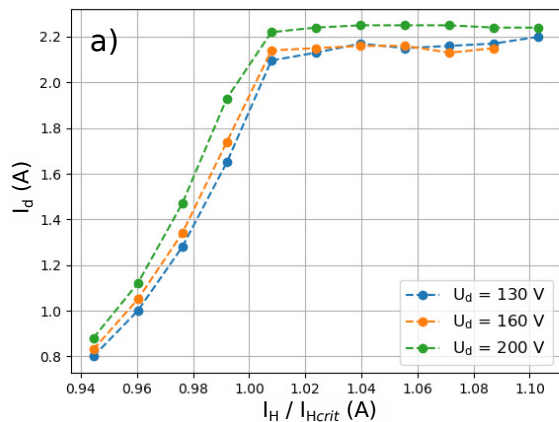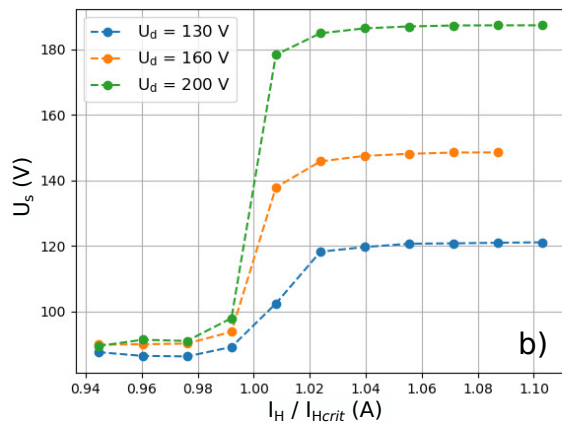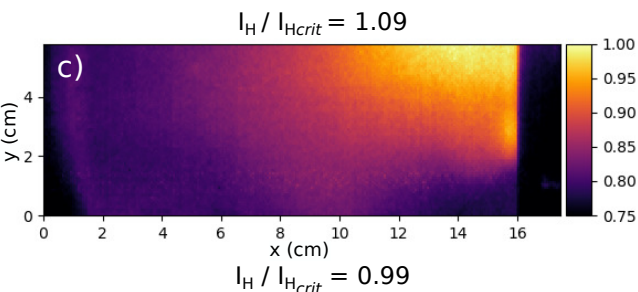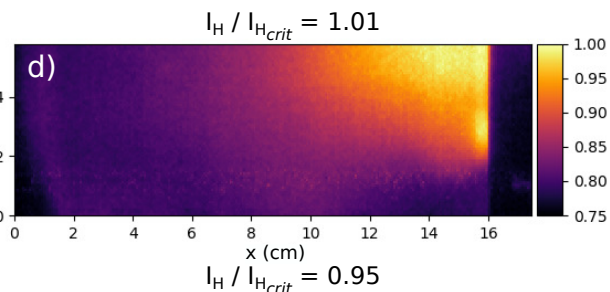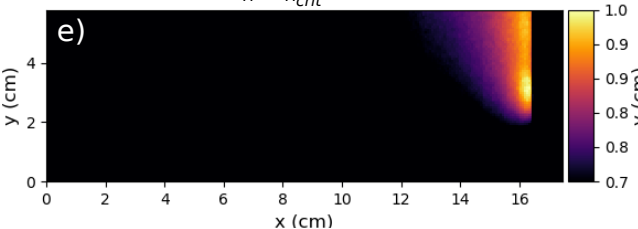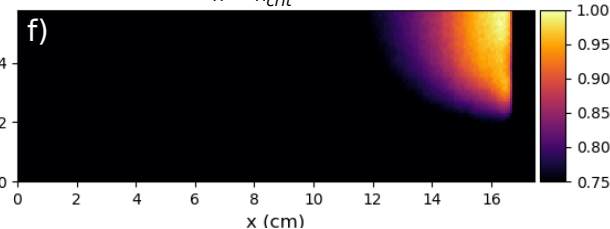

Supplement: s1 [file s1]

a) Hall Effect Thruster

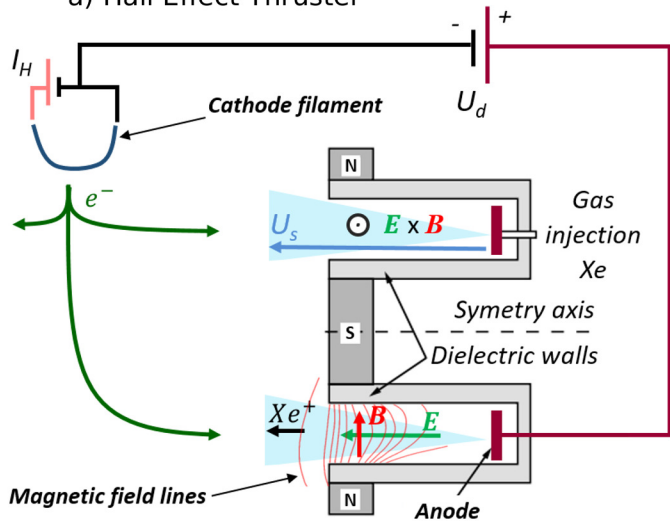

b) Vacuum vessel

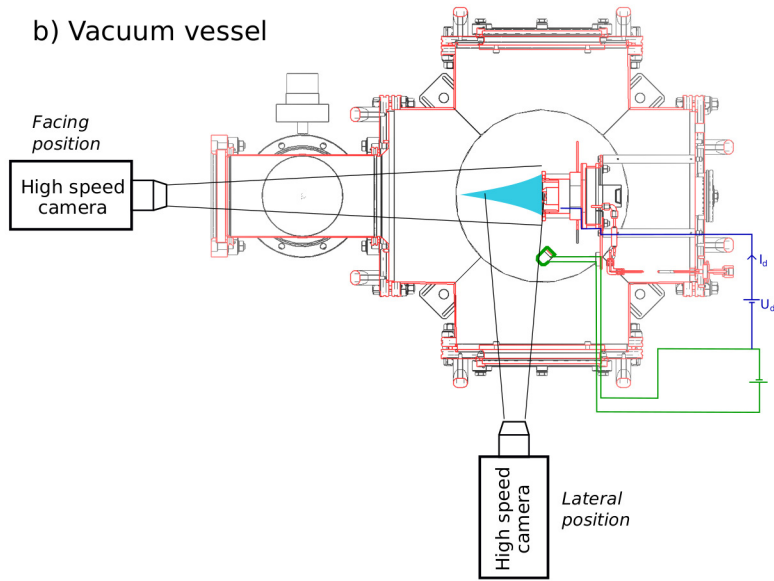

Supplement: s1 [file s1]

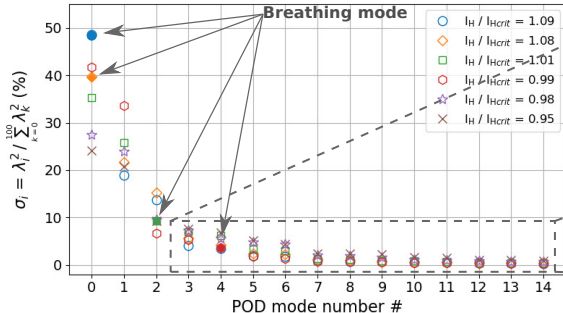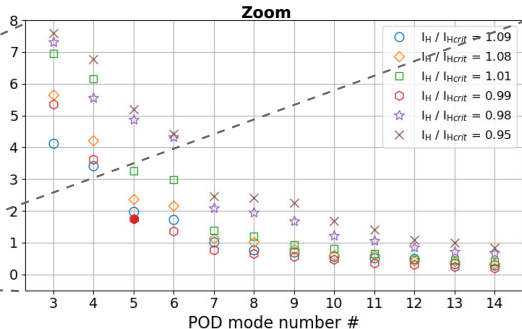

Supplement: s1 [file s1]

**First image**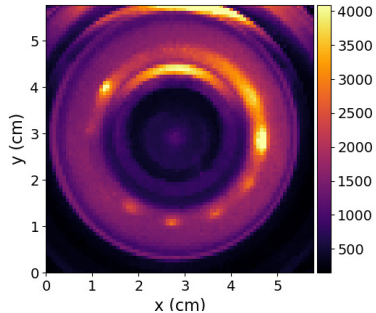**Mean image**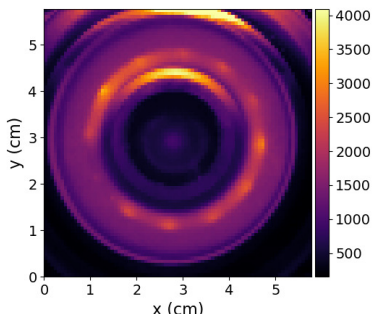**First image - Mean**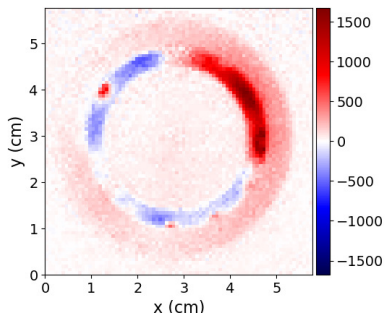**From the side  
of the thruster**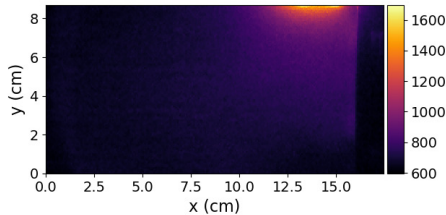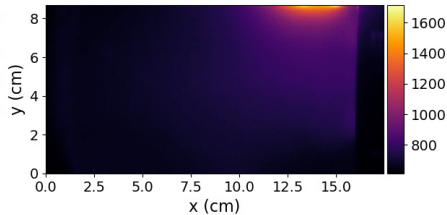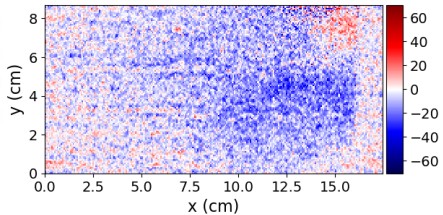

Supplement: s1 [file s1]
